# Supplementary material for: Electrokinetic Remediation of Zn-Polluted Soft Clay Using a Novel Electrolyte Chamber Configuration
Source: MDPI journal article supplement (doi:10.3390/toxics11030263), 2023-03-12
Supplement: s1 [file s1]

**Table S1.** Operating conditions for EKR of Zn and other heavy metals.

| Soil type                                                                                                | Research method       | Anolyte                                    | Catholyte                                                  | Electrolyte location                                                                                                       | Best removal rate of Zn (other heavy metals) (%) | Reference                |
|----------------------------------------------------------------------------------------------------------|-----------------------|--------------------------------------------|------------------------------------------------------------|----------------------------------------------------------------------------------------------------------------------------|--------------------------------------------------|--------------------------|
| A dredged sediment sample collected at the disposal site                                                 | Laboratory model test | 0.1 M EDDS<br>0.1 M CA                     | 0.1 M EDDS<br>0.1 M CA                                     | The ends of the soil chamber                                                                                               | 41.4                                             | (Ammami et al., 2022)    |
| Railroad soil contaminated by lubricant oil and Zn                                                       | Laboratory model test | 0.1 M MgSO <sub>4</sub> + 0.5 wt% tergitol | 0.1 M HNO <sub>3</sub>                                     | The ends of the soil chamber                                                                                               | 24.3                                             | (Park et al. 2009)       |
| Pb, Zn, and Cu contaminated Kaolin using sodium alginate and chitosan as biodegradable complexing agents | Laboratory model test | Distilled water                            | 0.1M HNO <sub>3</sub>                                      | The ends of the soil chamber                                                                                               | 95.0                                             | (Wang et al., 2021)      |
| Agricultural soil contaminated with multiple heavy metals                                                | Laboratory model test | Deionized water<br>0.1 M NaOH<br>0.5 M CA  | Deionized water<br>0.1 M CA<br>0.1 M EDTA<br>0.5 M CA      | The ends of the soil chamber                                                                                               | 73.3                                             | (Cameselle et al., 2021) |
| Dewatered sludge (approaching anode technique)                                                           | Laboratory model test | Deionized water<br>0.1 M EDDS              | Deionized water<br>0.1 M EDDS                              | The ends of the soil chamber                                                                                               | 56.8                                             | (Tang et al., 2020)      |
| Calcareous soil contaminated with Zn, Cd and Pb (anode displacement system)                              | Laboratory model test | 0.01 M acetic acid<br>EDTA                 | 0.01 M acetic acid<br>EDTA                                 | The ends of the soil chamber                                                                                               | 40.1                                             | (Beyrami 2021)           |
| Wast landfill site soil contaminated with Cu                                                             | Field test            | Water + 0.05 M CA                          | The perforated cathode pile filled with reactive materials | Slotted perforated PVC used as the electrolyte chamber and installed vertically to a depth of 4 m below the ground surface | 85.2 (Cu)                                        | (Chung 2009)             |
| A galvanizing plant site in Delft                                                                        | Field test            | Electrode solution at pH 4-5               | -                                                          | Anode locations installed up to 1 m below ground surface                                                                   | 33.0                                             | (Lageman, 1993)          |
| A rice field near a zinc refinery plant                                                                  | Field test            | NaOH                                       | Water<br>EDTA                                              | Anode and cathode locations installed up to 1.5 m below ground surface                                                     | 17.2 (Cu)<br>39.8 (As)<br>19.4 (Pb)              | (Kim et al. 2012)        |

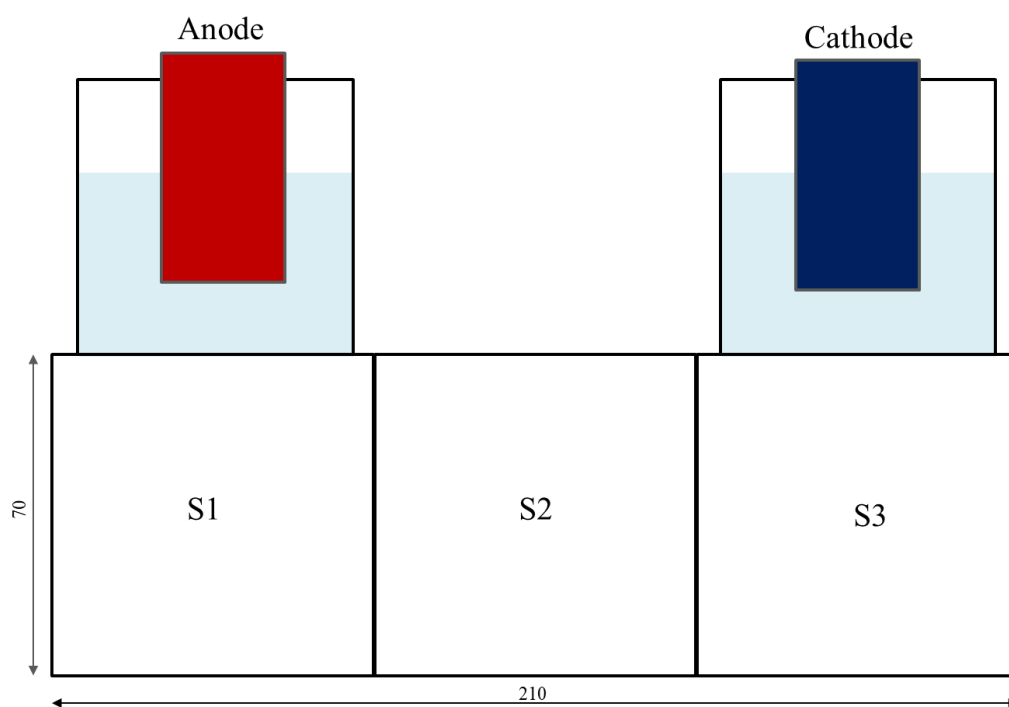

**Figure S1.** Soil sections represented as S1-S3 for water content, pH, and Zn concentration analysis (unit mm).

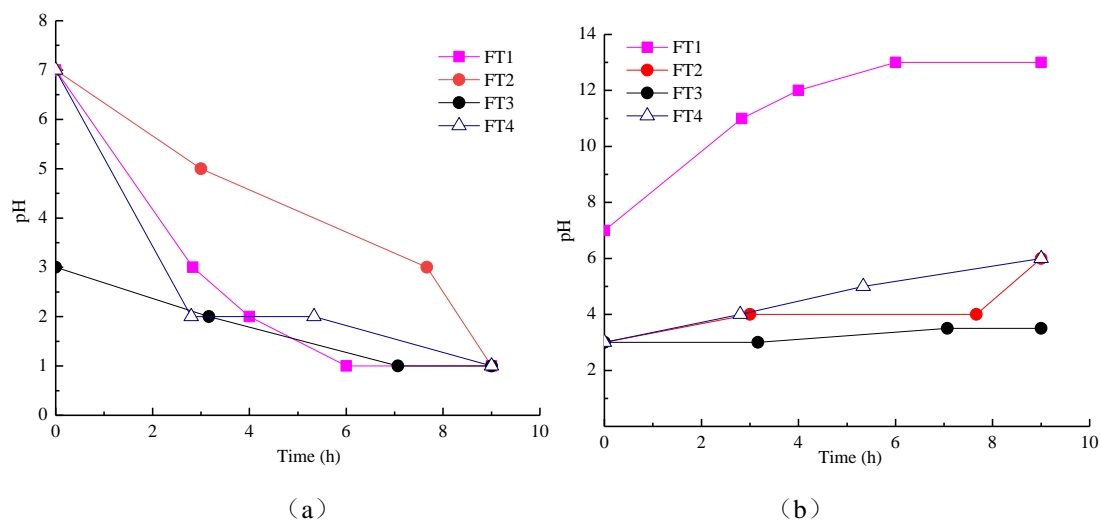

**Figure S2.** pH in electrolytes of feasibility tests: (a) anolyte and (b) catholyte.

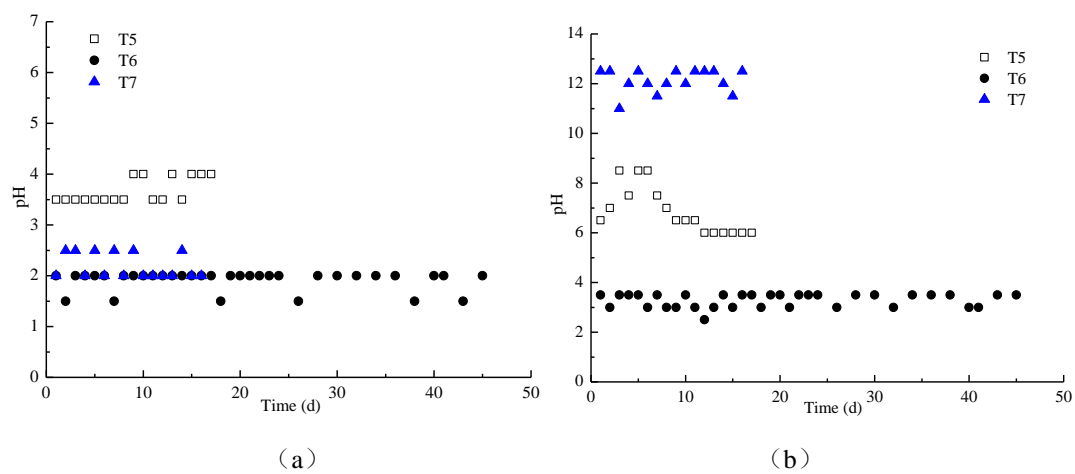

**Figure S3.** pH in electrolytes of T5, T6, and T7 (a) anolyte and (b) catholyte.
